# Supplementary material
Source: Springer Nature journal article supplement (https://www.springermedizin.de/resource/supplementary/12913_2008_792_MOESM1_ESM.pdf/9535594)
Supplement: MOESM1 [file 9535594]

## Energy absorbers and energy suppliers

### **Burden and task content:**

- physical load (too high or too low)
- mental stress (too high or too low)
- emotional stress
- general work stress (too high or too low)
- uncertainty about tasks and responsibilities
- disturbances at work

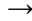

### **Work autonomy**

- planning tasks oneself (not enough or too much)
- deciding about breaks
- deciding about working hours

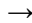

### **Relationships at work:**

- appreciation for work
- support of management
- support of colleagues
- social atmosphere at work

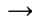

### **Suitable terms of employment and perspectives:**

- fit into the organisation
- job certainty
- payment in accordance with performance

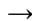

### **Work-home interference**

- burden in home situation
- commuting
- leisure activities

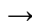

### **Wellbeing at work**

- work pleasure
- physical fatigue
- mental fatigue
- overload
